# Supplementary material
Source: PubMed Central journal article supplement (PMC3670604)
Supplement: NIHMS174719-supplement-1_si_001.pdf [file NIHMS174719-supplement-1_si_001.pdf]

**Supplementary materials for**

**Proteomic dissection of cell type-specific H2AX-interacting protein complex  
associated with hepatocellular carcinoma**

Xiaoli Yang<sup>1</sup>, Peng Zou<sup>1</sup>, Jun Yao<sup>1</sup>, Dong Yun<sup>1</sup>, Huimin Bao<sup>1</sup>, Ruyun Du<sup>1</sup>, Jing Long<sup>1</sup>, and Xian Chen<sup>1,2\*</sup>

<sup>1</sup> Department of Chemistry and Institute of Biomedical Sciences, Fudan University, Shanghai, China

<sup>2</sup> Department of Biochemistry and Biophysics, University of North Carolina at Chapel Hill, USA

\* To whom correspondence should be addressed:

Dr. Xian Chen

E-mail: [xian\\_chen@med.unc.edu](mailto:xian_chen@med.unc.edu)

Fax: 919-966-2852

Tel: 919-843-5310

**Table 1S.** Ratio of the ectopic to endogenous H2AX / $\gamma$ -H2AX expression in IB assay by densitometry.

---

| Protein name   | Ratio<br>ectopic/endogenous and SD |
|----------------|------------------------------------|
| H2AX           | 0.81 $\pm$ 0.05                    |
| $\gamma$ -H2AX | 1.15 $\pm$ 0.04                    |

---

(Standard deviation (SD) was obtained from 3 replicated measurements. Empirically, we selected the ratio > 1.2 for showing the up-regulated protein expression, and ratio < 0.8 for showing the down-regulated protein expression.)

**Table 2S.** Ratio of protein expression in BLM(+) cells to that in BLM(-) cells in IB assay after IP by densitometry.

---

| Protein name   | Ratio<br>BLM(+)/BLM(-) and SD |
|----------------|-------------------------------|
| PARP-1         | 1.34 $\pm$ 0.10               |
| PEP1           | 1.27 $\pm$ 0.04               |
| 14-3-3 $\zeta$ | 1.51 $\pm$ 0.06               |
| CFL1           | 1.40 $\pm$ 0.02               |
| $\gamma$ -H2AX | 1.65 $\pm$ 0.09               |
| FLAG           | 1.05 $\pm$ 0.03               |

---

(Standard deviation (SD) was obtained from 3 replicated measurements. Empirically, we selected the ratio > 1.2 for showing the up-regulated protein expression, and ratio < 0.8 for showing the down-regulated protein expression.)

**Table 3S.** Ratio of protein expression in 7703 cells to that in 7701 cells in IB assay after IP by densitometry.

---

| Protein name | Ratio |
|--------------|-------|
|--------------|-------|

7703/7701 and SD

---

|         |           |
|---------|-----------|
| PARP-1  | 1.44±0.07 |
| PEP1    | 1.03±0.04 |
| CFL1    | 1.32±0.07 |
| 14-3-3ζ | 1.41±0.09 |
| γ-H2AX  | 0.92±0.03 |
| FLAG    | 0.96±0.02 |

---

(Standard deviation (SD) was obtained from 3 replicated measurements. Empirically, we selected the ratio > 1.2 for distinguishing the up-regulated protein expression.)
